# Supplementary material for: Upgrading Carthamus by HTC: Improvement of Combustion Properties
Source: MDPI journal article supplement (doi:10.3390/fire7040106), 2024-03-22
Supplement: s1 [file s1]

## Supplementary material:

# Upgrading Carthamus by HTC: improvement of combustion properties

José Manuel Díaz-Rasero, Beatriz Ledesma, María Alonso and Silvia Román\*

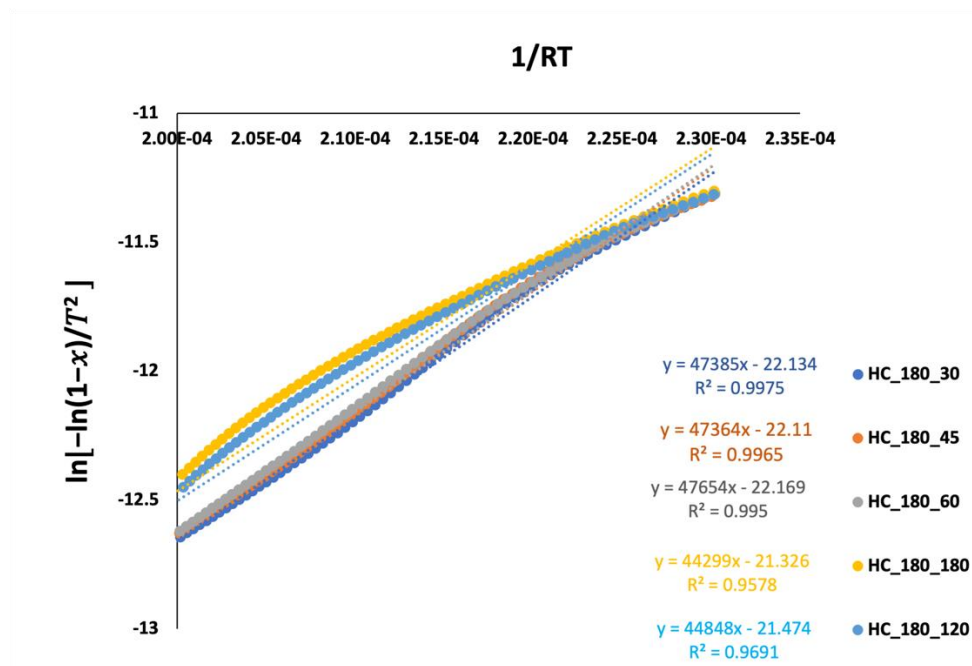

**Figure S1.** Application of kinetic model to experimental data. 180 °C runs for different residence time periods.
